# Supplementary material for: A new strategy to prepare polymer composites with versatile shape memory properties
Source: Royal Society of Chemistry journal article supplement (doi:10.1039/c2jm35619h), 2012-01-01
Supplement: c2jm35619h.pdf [file c2jm35619h.pdf]

*Supplementary Information for*

## A new strategy to prepare polymer composites with versatile shape memory properties

Qinglong Zhang, Shijie Song, Jiachun Feng\* and Peiyi Wu

**Table S1** Multi-stage recovery thermomechanical cycles of SEBS-50

| Cycle Number               | 1  | 2  | 3  | 4  | 5  |
|----------------------------|----|----|----|----|----|
| R <sub>r</sub> (35 °C) (%) | 11 | 9  | 8  | 9  | 7  |
| R <sub>r</sub> (40 °C) (%) | 19 | 16 | 19 | 18 | 17 |
| R <sub>r</sub> (45 °C) (%) | 36 | 32 | 36 | 33 | 34 |
| R <sub>r</sub> (50 °C) (%) | 72 | 70 | 67 | 65 | 65 |
| R <sub>r</sub> (55 °C) (%) | 99 | 98 | 97 | 97 | 97 |

**Table S2** Multi-stage recovery thermomechanical cycles of SEBS-20

| Cycle Number               | 1  | 2  | 3  | 4  | 5  |
|----------------------------|----|----|----|----|----|
| R <sub>r</sub> (40 °C) (%) | 3  | 2  | 4  | 2  | 2  |
| R <sub>r</sub> (45 °C) (%) | 14 | 14 | 14 | 9  | 11 |
| R <sub>r</sub> (50 °C) (%) | 27 | 26 | 26 | 21 | 21 |
| R <sub>r</sub> (55 °C) (%) | 78 | 77 | 78 | 74 | 76 |
| R <sub>r</sub> (60 °C) (%) | 99 | 98 | 97 | 95 | 97 |

**Table S3** Triple-shape memory thermomechanical cycles of SEBS-20

| Cycle Number             | 1  | 2  | 3  | 4  | 5  |
|--------------------------|----|----|----|----|----|
| R <sub>f</sub> (C→A) (%) | 99 | 99 | 92 | 93 | 93 |
| R <sub>f</sub> (A→B) (%) | 92 | 90 | 89 | 90 | 88 |
| R <sub>r</sub> (B→A) (%) | 79 | 78 | 82 | 80 | 78 |
| R <sub>r</sub> (A→C) (%) | 99 | 99 | 99 | 99 | 99 |
| Recovery time(B→A) (s)   | 10 | 12 | 11 | 11 | 10 |
| Recovery time(A→C) (s)   | 2  | 2  | 2  | 2  | 2  |

**Table S4** Triple-shape memory thermomechanical cycles of SEBS-50

| <b>Cycle Number</b>      | <b>1</b> | <b>2</b> | <b>3</b> | <b>4</b> | <b>5</b> |
|--------------------------|----------|----------|----------|----------|----------|
| R <sub>f</sub> (C→A) (%) | 88       | 86       | 87       | 90       | 88       |
| R <sub>f</sub> (A→B) (%) | 83       | 85       | 85       | 85       | 82       |
| R <sub>r</sub> (B→A) (%) | 85       | 87       | 85       | 92       | 87       |
| R <sub>r</sub> (A→C) (%) | 99       | 99       | 99       | 99       | 99       |
| Recovery time(B→A) (s)   | 7        | 8        | 8        | 6        | 10       |
| Recovery time(A→C) (s)   | 2        | 2        | 2        | 2        | 2        |

**Table S5** Triple-shape memory thermomechanical cycles of SEBS-80

| <b>Cycle Number</b>      | <b>1</b> | <b>2</b> | <b>3</b> | <b>4</b> | <b>5</b> |
|--------------------------|----------|----------|----------|----------|----------|
| R <sub>f</sub> (C→A) (%) | 68       | 62       | 66       | 66       | 64       |
| R <sub>f</sub> (A→B) (%) | 78       | 83       | 78       | 75       | 74       |
| R <sub>r</sub> (B→A) (%) | 99       | 99       | 99       | 99       | 99       |
| R <sub>r</sub> (A→C) (%) | 99       | 99       | 99       | 99       | 99       |
| Recovery time(B→A) (s)   | 3        | 4        | 3        | 3        | 5        |
| Recovery time(A→C) (s)   | 1        | 1        | 1        | 1        | 1        |

**Table S6** Quadruple-shape memory thermomechanical cycles of SEBS-20

| <b>Cycle Number</b>      | <b>1</b> | <b>2</b> | <b>3</b> | <b>4</b> | <b>5</b> |
|--------------------------|----------|----------|----------|----------|----------|
| R <sub>f</sub> (D→A) (%) | 80       | 84       | 80       | 78       | 86       |
| R <sub>f</sub> (A→B) (%) | 60       | 55       | 64       | 54       | 58       |
| R <sub>f</sub> (B→C) (%) | 80       | 76       | 75       | 85       | 77       |
| R <sub>r</sub> (C→B) (%) | 75       | 78       | 80       | 82       | 80       |
| R <sub>r</sub> (B→A) (%) | 67       | 79       | 78       | 69       | 77       |
| R <sub>r</sub> (A→D) (%) | 99       | 99       | 99       | 99       | 99       |

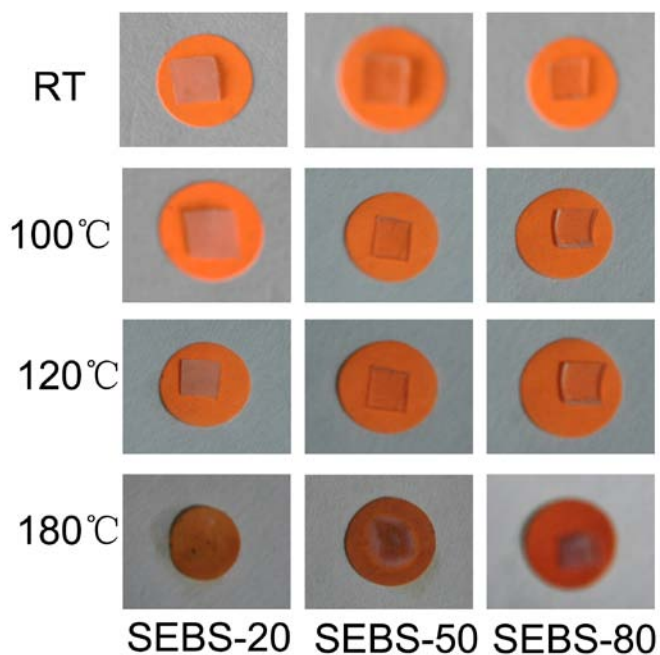

**Figure S1** Photographs of SEBS/paraffin composites after holding at different temperatures.

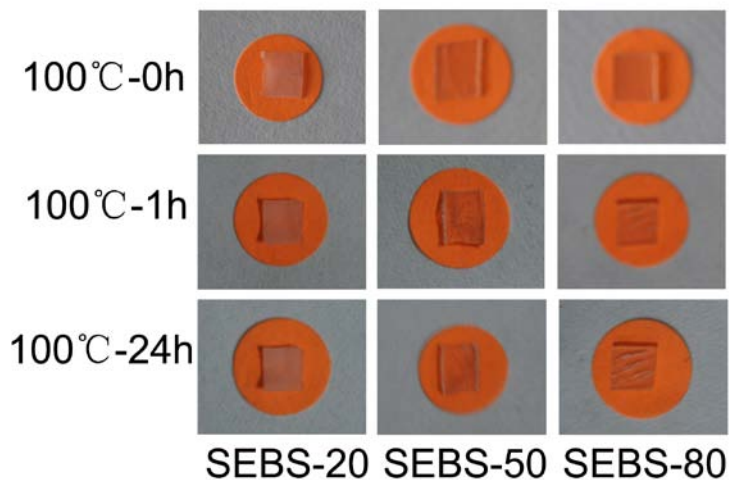

**Figure S2** Photographs of SEBS/paraffin composites after holding at 100°C for different time.

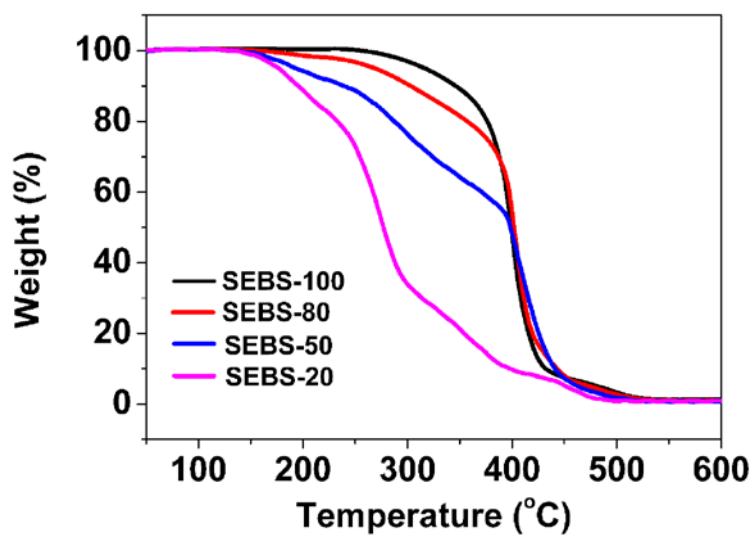

**Figure S3** TGA curves of SEBS/paraffin composites.
